# Supplementary material
Source: PubMed Central journal article supplement (PMC2810499)
Supplement: NIHMS165018-supplement-Supplemental_data.pdf [file NIHMS165018-supplement-Supplemental_data.pdf]

Supplementary Material

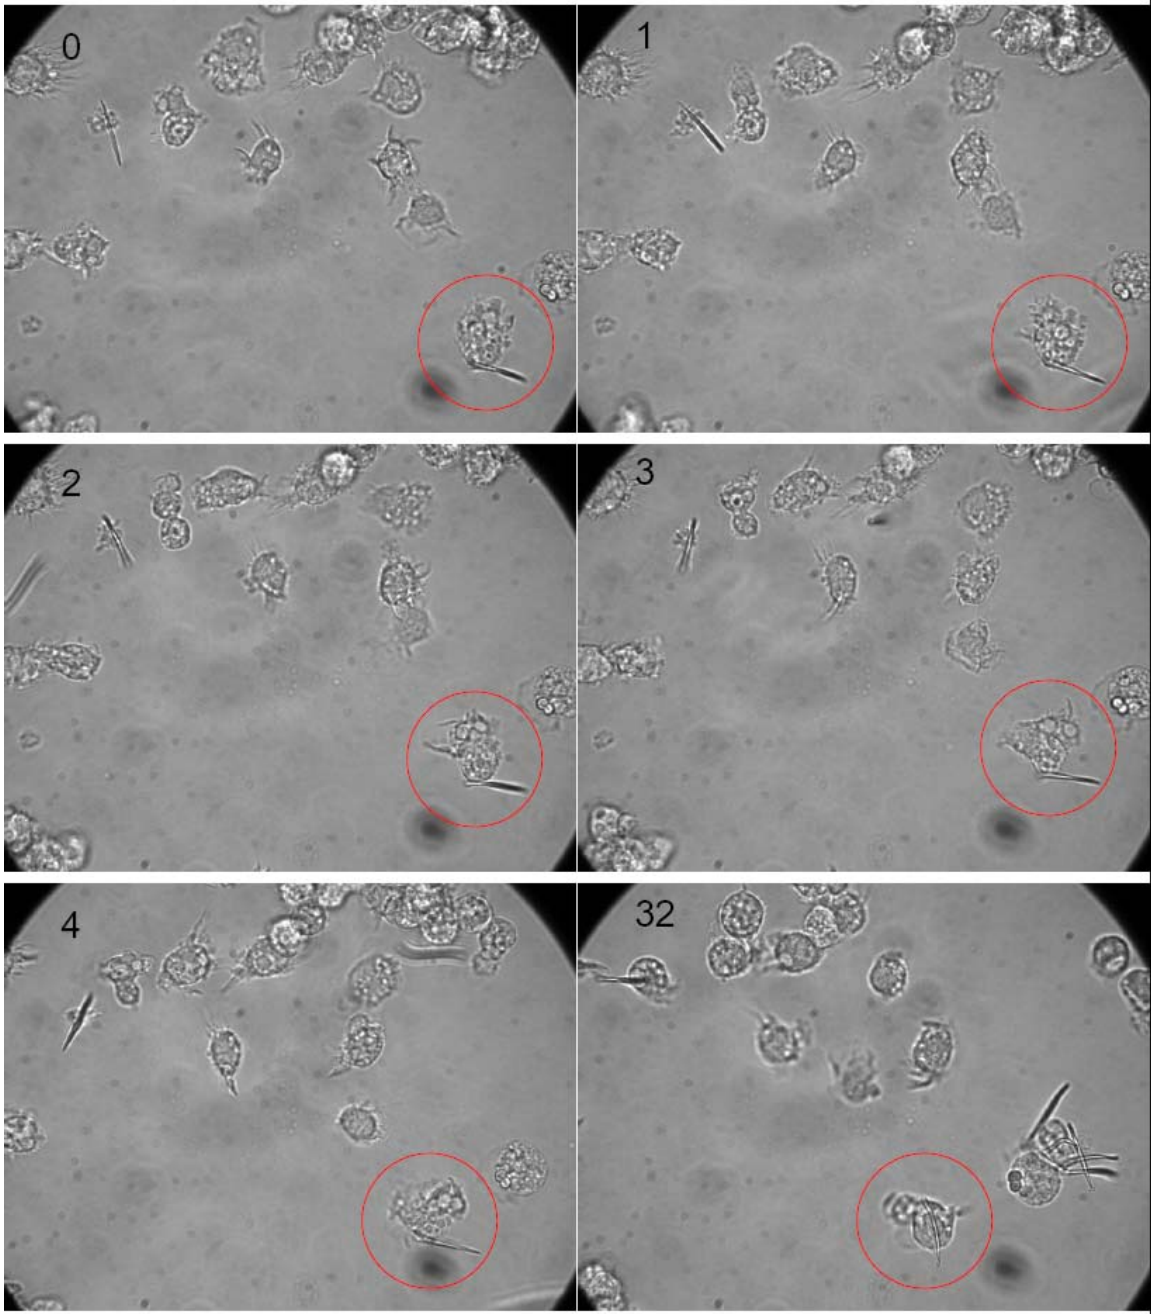

The images above are the un-cropped versions of the clips in manuscript Figure 3b. Numbers indicate the time after attachment and circles identify the cell of interest.
